# Supplementary material for: Role of surface charge in bioavailability and biodistribution of tri-block copolymer nanoparticles in rats after oral exposure
Source: Royal Society of Chemistry journal article supplement (doi:10.1039/c3tx20072h), 2013-01-01
Supplement: c3tx20072h.pdf [file c3tx20072h.pdf]

Cite this: DOI: 10.1039/c0xx00000x

www.rsc.org/tx

## Electronic Supplementary Information

### Role of surface charge in bioavailability and biodistribution of tri-block copolymer nanoparticles in rats after oral exposure

Sourav Bhattacharjee,<sup>\*a,b</sup> Antonius TM Marcelis,<sup>a</sup> Han Zuilhof,<sup>a</sup> Ruud A Woutersen,<sup>c</sup> Ivonne MCM Rietjens,<sup>b</sup> Gerrit M Alink<sup>b</sup>

<sup>s</sup> Received (in XXX, XXX) Xth XXXXXXXXXX 20XX, Accepted Xth XXXXXXXXXX 20XX

DOI: 10.1039/b000000x

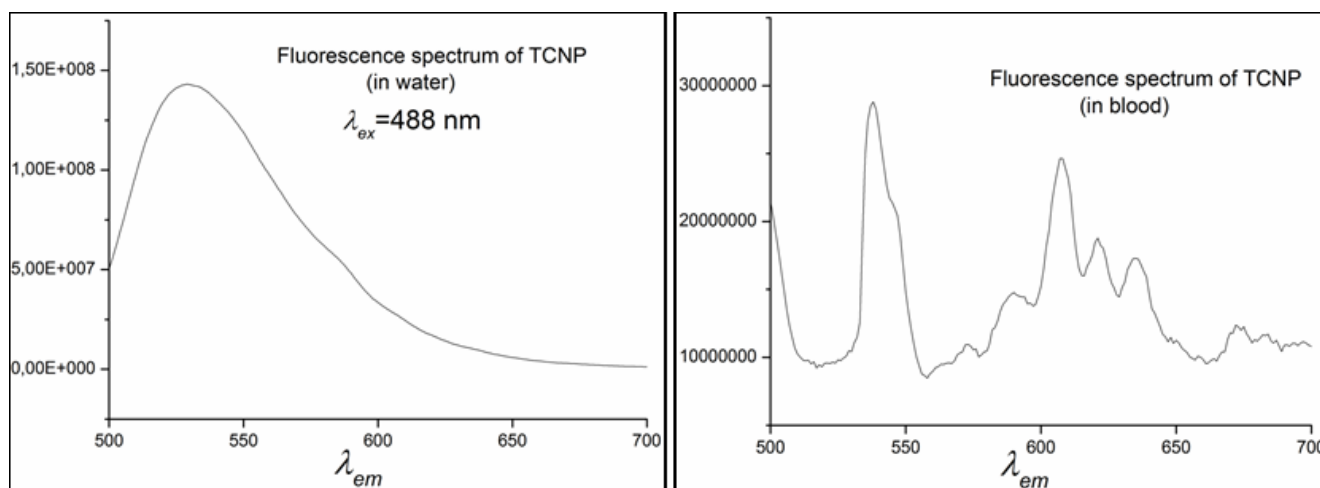

Fig. S1 Fluorescence emission spectrum of the TCNP both in water and in blood to show the distinct peak at 543 nm characteristic for the TCNP at  $\lambda_{ex}=488$  nm.

10

Table S2 Characterization data of the different TCNP used in this in vivo experiment

| TCNP                              | Size in water (nm)*                      | $\zeta$ -potential in water (mV) |
|-----------------------------------|------------------------------------------|----------------------------------|
| TCNP-NH <sub>3</sub> <sup>+</sup> | 45 ± 5 (both positive and negative TCNP) | + (22 ± 5)                       |
| TCNP-COO <sup>-</sup>             |                                          | - (20 ± 5)                       |

\*Sizes of the different TCNP in water were measured by dynamic light scattering (DLS) technique

15
